# Supplementary material
Source: MDPI journal article supplement (https://www.mdpi.com/search?q=ijms-21-02931)
Supplement: s001 [file ijms-21-02931-s001.pdf]

## Supplementary Information

# Long Tandem Arrays of *Cassandra* Retroelements and Their Role in Genome Dynamics in Plants

Ruslan Kalendar <sup>1,2,\*</sup>, Olga Raskina <sup>3</sup>, Alexander Belyayev <sup>4</sup> and Alan H. Schulman <sup>5,6,\*</sup>

<sup>1</sup> Department of Agricultural Sciences, University of Helsinki, P.O. Box 27 (Latokartanonkaari 5), FI-00014 Helsinki, Finland

<sup>2</sup> RSE “National Center for Biotechnology”, Korgalzhyn Highway 13/5, 010000 Nur-Sultan, Kazakhstan

<sup>3</sup> Institute of Evolution, University of Haifa, Mount Carmel, Haifa 31905, Israel; raskina@research.haifa.ac.il

<sup>4</sup> Laboratory of Molecular Cytogenetics and Karyology, Institute of Botany of the ASCR, Zámek 1, CZ-252 43 Průhonice, Czech Republic; alexander.belyayev@ibot.cas.cz

<sup>5</sup> Natural Resources Institute Finland (Luke), Latokartanonkaari 9, FI-00790 Helsinki, Finland

<sup>6</sup> Institute of Biotechnology and Viikki Plant Science Centre, University of Helsinki, P.O. Box 65, FI-00014 Helsinki, Finland

\* Correspondence: ruslan.kalendar@helsinki.fi (R.K.); alan.schulman@helsinki.fi (A.H.S.)

**Supplementary Table S1.** Plant species analysed and corresponding *Cassandra* accessions.

| Plant species                                | <i>Cassandra</i> Genbank accession |
|----------------------------------------------|------------------------------------|
| <i>Amaranthus palmeri</i>                    | MT230479                           |
| <i>Amblyopyrum muticum</i>                   | AY603371                           |
| <i>Arabidopsis thaliana</i>                  | AY923749                           |
| <i>Avena sativa</i>                          | AY271960                           |
| <i>Brachypodium distachyon</i>               | DQ094839-DQ094843                  |
| <i>Brassica oleracea</i>                     | AY860307                           |
| <i>Brassica rapa</i>                         | AY860308                           |
| <i>Bromus sterilis</i>                       | AY271957                           |
| <i>Colpodium drakensbergense</i>             | FJ975775                           |
| <i>Chaenomeles japonica</i>                  | AY860309                           |
| <i>Colobanthus quitensis</i>                 | EU882730                           |
| <i>Colpodium versicolor</i>                  | FJ975776                           |
| <i>Deschampsia antarctica</i>                | EU867815                           |
| <i>Didymochlaena truncatula</i>              | AY860311                           |
| <i>Eremopyrum distans</i>                    | AY603372                           |
| <i>Fragaria x ananassa</i>                   | AY860312                           |
| <i>Garcinia mangostana</i>                   | EU140956                           |
| <i>Glycine max</i>                           | EF125870                           |
| <i>Henrardia persica</i>                     | AY603374                           |
| <i>Hordeum brachyantherum</i>                | AY603373                           |
| <i>Hordeum marinum</i>                       | AY603375                           |
| <i>Hordeum vulgare</i>                       | AY164585                           |
| <i>Linum usitatissimum</i>                   | DQ767972                           |
| <i>Lotus japonicus</i>                       | AY603364, AY603365                 |
| <i>Malus x domestica</i>                     | AY603366-AY603368                  |
| <i>Medicago truncatula</i>                   | AY603369                           |
| <i>Mesembryanthemum crystallinum</i>         | AY603370                           |
| <i>Nephrolepis exaltata</i>                  | AY860313                           |
| <i>Oryza glaberrima</i>                      | HM481419                           |
| <i>Oryza minuta</i>                          | HM481420                           |
| <i>Oryza sativa</i>                          | AF538604, AF538611, AY271961       |
| <i>Peridictyon sanctum</i>                   | AY603376                           |
| <i>Phleum pratense</i>                       | AF538603, AF538606-AF538617        |
| <i>Pisum sativum</i>                         | DQ788719                           |
| <i>Populus tremula x Populus tremuloides</i> | EF125876                           |

|                                 |                              |
|---------------------------------|------------------------------|
| <i>Populus trichocarpa</i>      | EF125877                     |
| <i>Prunus domestica</i>         | AY860314                     |
| <i>Psathyrostachys fragilis</i> | AY271962                     |
| <i>Robinia pseudoacacia</i>     | EF125871                     |
| <i>Rosa hybrid</i>              | AY860315                     |
| <i>Rosa rugosa</i>              | AY860316                     |
| <i>Rubus idaeus</i>             | AY860317                     |
| <i>Rumex acetosa</i>            | KC686838                     |
| <i>Saccharum hybrid</i>         | KC686839                     |
| <i>Saccharum officinarum</i>    | EF125872                     |
| <i>Saruma henryi</i>            | EF125873                     |
| <i>Secale cereale</i>           | AY359471                     |
| <i>Silene latifolia</i>         | KC686837                     |
| <i>Solanum lycopersicum</i>     | EU177767                     |
| <i>Sorghum bicolor</i>          | AF538605, EF125875           |
| <i>Spartina alterniflora</i>    | AY603377                     |
| <i>Sphaeropteris cooperi</i>    | AY860310                     |
| <i>Triticum aestivum</i>        | AY271963                     |
| <i>Vaccinium corymbosum</i>     | DQ673669                     |
| <i>Zea mays</i>                 | AF538618, AY271958, AY271959 |
| <i>Zingeria biebersteiniana</i> | FJ975777, FJ975780           |
| <i>Zingeria kochii</i>          | FJ975778                     |
| <i>Zingeria pisdica</i>         | FJ975779                     |
| <i>Zingiber officinale</i>      | EF125874                     |

**Supplementary Table S2.** Specific primers for Cassandra and 5S rRNA gene.

| <b>ID</b> | <b>Sequence (5'-3')</b>        | <b>Location</b> | <b>Primer design source</b>                          |
|-----------|--------------------------------|-----------------|------------------------------------------------------|
| 784       | CGAGTGAGGACAAAGTGCGCAG         | 161→182         | LTR, Cassandra, <i>Hordeum vulgare</i>               |
| 975       | ATCCCTAATAAGCCAGGCTATC         | 4←25            | LTR, Cassandra, <i>Hordeum vulgare</i>               |
| 977       | TTGTCTCACTCATGCGCACC           | 153←173         | LTR, Cassandra, <i>Hordeum vulgare</i>               |
| 4170      | TGTAACCGCGAGGGTCGGCTCTGATACCA  | 269←297         | PBS, Cassandra, <i>Hordeum vulgare</i>               |
| 1032      | ACCGCGAGGGTCGGCTCTGATACCA      | 269←293         | PBS, Cassandra, <i>Hordeum vulgare</i>               |
| 981       | CATGACCGCACACCTGTCCG           | 308←327         | Internal part, Cassandra, <i>Hordeum vulgare</i>     |
| 982       | GACGAGGACGTCGGTTCCTCT          | 428→448         | Internal part, Cassandra, <i>Hordeum vulgare</i>     |
| 1801      | ACACCACCACTCAGAGGAACCGA        | 438←460         | Internal part, Cassandra, <i>Hordeum vulgare</i>     |
| 1802      | AGAGGAACCGACGTCCTCGTCG         | 427←448         | Internal part, Cassandra, <i>Hordeum vulgare</i>     |
| 4171      | CATGTAACCGCGAGGGTCGGCTCTG      | 275←299         | Internal part, Cassandra, <i>Hordeum vulgare</i>     |
| 3801      | GCTTGTGGTTGATCGACGAGG          | 435→455         | Internal part, Cassandra, <i>Avena sativa</i>        |
| 3802      | ACGCCATGTAACCGCGAGG            | 302←321         | Internal part, Cassandra, <i>Avena sativa</i>        |
| 4172      | TGGGGTTGATCGACGAGGACGTCGATCT   | 438→465         | Internal part, Cassandra, <i>Avena sativa</i>        |
| 4173      | TGGGGTTGACCGACGAGGACGTCGGTCT   | 438→465         | Internal part, Cassandra, <i>Avena sativa</i>        |
| 4174      | GCTTGTGGTTGATCGACGAGGACG       | 435→458         | Internal part, Cassandra, <i>Avena sativa</i>        |
| 4175      | GGAACGTTCTGTGGCCCGACGAGGACGTCG | 410→440         | Internal part, Cassandra, <i>Hordeum vulgare</i>     |
| 2260      | ACACGCCAAGCCAGATCGTCC          | 356←377         | Internal part, Cassandra, <i>Brachypodium</i>        |
| 2261      | ACTGACGAGGACGTCAGGTCC          | 794→814         | Internal part, Cassandra, <i>Brachypodium</i>        |
| 2070      | TCAGCGTGTGTTTGTCTCACTCG        | 306←328         | Internal part, Cassandra, <i>Medicago truncatula</i> |
| 2071      | ACACGCTGAAAAGACTCGTGTTG        | 779→801         | Internal part, Cassandra, <i>Medicago truncatula</i> |
| 921       | AGTGTGCCGACGAGGACGTCG          | 297←322         | LTR-Internal part, Cassandra, <i>Malus</i>           |
| 1611      | GGCTCTGATACCAAATTGTCACATCC     | 232←254         | LTR, Cassandra, <i>Malus</i>                         |
| 2016      | AGGAGCTTGGGCGACCAAAGCGGAC      | 181→205         | LTR, Cassandra, <i>Vaccinium</i>                     |
| 2495      | AGACTGTGTAGGGATGGGGCTA         | 139→160         | LTR, Cassandra, <i>Garcinia mangostana</i>           |
| 2496      | CATCCCTACACAGTCTCAGGAT         | 133←154         | LTR, Cassandra, <i>Garcinia mangostana</i>           |
| 631       | AGAACTCCAAAGTTAAGCGTGC         | 122→143         | LTR, Cassandra, <i>Silene latifolia</i>              |
| 629       | AGCACGCTTAACTTTGGAGTTC         | 123←144         | LTR, Cassandra, <i>Silene latifolia</i>              |
| 1118      | TAAGGTTTTGGGGTCTGGATGGCTAG     | 68→93           | LTR, Cassandra, fern <i>Nephrolepis exaltata</i>     |
| 1120      | TAAGGTGTTAGGAACCTCCGGTCTAGC    | 43←69           | LTR, Cassandra, fern <i>Nephrolepis exaltata</i>     |
| 622       | CTTCCCAGGAGGTCACCCATC          | 83←103          | 5S ribosomal RNA gene (121 bp)                       |
| 623       | TGATGGGTGACCTCCTGGGAAG         | 82→103          | 5S ribosomal RNA gene (121 bp)                       |
| 2721      | TGGGAAGTCCTCGTGTTGCA           | 97→116          | 5S ribosomal RNA gene (121 bp)                       |
| 2722      | AGTGCTGGTATGATCGCACC           | 3←22            | 5S ribosomal RNA gene (121 bp)                       |

**Supplementary Table S3.** *Cassandra* tandem examples in EST and genome accessions.

| GenBank accession                                  | Sequence with <i>Cassandra</i> tandems (red is LTR, blue is internal part of <i>Cassandra</i> )                                                                                                                                                                                                                                                                                                                                                                                                                                                                                                                                                                                                                                                                                                                                                                                                                                                                                                                                                                                                                                                                                                                                                                                                                                                                                                                                                                                                                                                                                                                                                                                                                                                                                                                                                                                                                                                                                                                                                                                                                                                                                                 |
|----------------------------------------------------|-------------------------------------------------------------------------------------------------------------------------------------------------------------------------------------------------------------------------------------------------------------------------------------------------------------------------------------------------------------------------------------------------------------------------------------------------------------------------------------------------------------------------------------------------------------------------------------------------------------------------------------------------------------------------------------------------------------------------------------------------------------------------------------------------------------------------------------------------------------------------------------------------------------------------------------------------------------------------------------------------------------------------------------------------------------------------------------------------------------------------------------------------------------------------------------------------------------------------------------------------------------------------------------------------------------------------------------------------------------------------------------------------------------------------------------------------------------------------------------------------------------------------------------------------------------------------------------------------------------------------------------------------------------------------------------------------------------------------------------------------------------------------------------------------------------------------------------------------------------------------------------------------------------------------------------------------------------------------------------------------------------------------------------------------------------------------------------------------------------------------------------------------------------------------------------------------|
| <p><i>Saruma henryi</i><br/>(dt599514)</p>         | <p>aaacagattgtacataccttttatgtgacgtcgtgcttgacttngagtaagttcaggatgggtgacctgaccgggaagtcttgttgagggggagccaaatgcgacaat<br/>attattattattagaggggtgggggtgttaca<b>aatgggatcagagccagtgcccagatggggggagcatgcacaagcctataaaagtcgccagttaagacgttgggtcc</b><br/><b>taagaggggggtgat</b>tgtagcgtcccatattacctgggtatggagatgggcttatatgtatacttacacccttaataataacaacgcatttttaaagtcgtgatggcaa<br/>tgatcccataagaactccgtagttaagcgtgctcgggtgagagcaatttcaggatgggtgacctgatcgggaagtcttgttgagggggagccaaaagcggataatatt<br/>gttgttattagaggggtgggggtgttaca<b>aatgggatcagagccaataccagcctgagatggggggagcgtgcaactagcccatgaaggtcgtcagcagggacgctggg</b><br/><b>tcctaagaggggtgat</b>tgtgacgtcccacatcgctgggtatggagatgggactgtgcttgtatgtaaaatccacaccatttctaataacaacacgttttaaagat<br/>gtgatggcaatgatcccataaaaactctgtagttaagcgtgtttggcttagagtaattttaggatgagtgacctgacggaaagtcttgttgagggggagccaaaagca<br/><b>gacaatattgttgttattagaggggtgggggtgttaca</b>ttttgtaccaatgttgatatgtgacccttcaaaagtcacc</p>                                                                                                                                                                                                                                                                                                                                                                                                                                                                                                                                                                                                                                                                                                                                                                                                                                                                                                                                                                                                                                                                                                                                                                                                                                                 |
| <p><i>Arabidopsis thaliana</i><br/>(all138645)</p> | <p>caactcaccgattgaaactgatatttctcctccactatttgccaaaaagaacaatttaagaaacttattataactcataaaacaacaaataactcggata<br/>ttgcttaaaacttaatgatttcaaatcttttctctctaataatcgtgcaatttttaaaagattttatccttaattagttgcaataatttttcttagccaccaagaa<br/>agacctaatcgtctatataacatttttgcaacacttt<b>tataaaataaatcctcaagttggattttgtttacaaggaatgtcattcgcattaattattatcaattaa</b><br/><b>ttaataattcctaattactagtgtaacactccgagagaactccacagttaagtgcttgggtttgagtagtttcaggatgggtgaccttcggagaagtgattgtcgg</b><br/><b>aaccatgtgagtgaggacaaagaatgggaaaagaaaatgtgataaacttgaatagatggtaataatctttaaagcctcctggacgtgacgcaactgactgttgacaga</b><br/><b>gggtggcccattggcccagagaggacgtagggcccactgataggggcagtcgggacgttaca</b><b>agtggatctgagccaaaccataagagtgtagagtcagaagg</b><br/><b>ctcgcaccatcggggtatagccttgggtgcgaacgaggtcattcgcgatctgttagtggggatgaat</b><b>tgtaacaccccgat</b><b>ttcaggaatattgtggtgcatgaggag</b><br/><b>aggttttaacataatttatttgccacctatgtcaccaaaatgtacttatcttttcgggtcaaaggtcttgagagaattccacagttaagcatgcttggactggaata</b><br/><b>gtttcaagattggtgaccttcgagaagtgattgtcggaaacctgagtgagaacaaagcatgggaaaagctcatttgggtgattttagggtcagtaacaagtaat</b><br/><b>taaagcctcccagcatggtgacccgaccgtcggataggggtggatccattggcccagagattacgtggggcccacaaatagtgggtggtcagagcattaga</b><b>agtggt</b><br/><b>tatcagagccgaacctaaatgagtggtgagtcagaaggctcgcaccatcgggggttacgttcttactgcacaacgaacacgtaacaatctgttaatgcggtgaatt</b><br/><b>gtaataccccggtttcaggaattggtttggccacctatgtcatcaaagtgcaacttatcttttcgggtcaaacatcctgagagaacgccacagttaagcatgcttgggc</b><br/><b>tcgaatagttcaggatgggtgacctcccgggaagtgattgtcggaccaatgcgtgtgaggacaaagcatggagaatgatcatgtggtgattttagggatggtaaca</b><br/><b>agtctttaaagcctctctcaggttacgcaccccaccattggacagaagtgagccatggggccaaaagagaacgtggggccaactggtaagggcggtcggggcgta</b><br/><b>ca</b>actagcatttcattatctaataatctctatcgggttattagaaaaatattaggaattattaatattatacttttattaaggtaaaatattatagttatttcaagt<br/>ttattaacattttagaataatttaacaaaaaatggttttagaataatttataaaatatttaaaaaaacatttgaagaaaagttttaaattgatttgaattataatttct<br/>taataaaagtattatttaaaaaaacacgaaaaataatgtttaatttcaccgaaccagattagatggttaggaagagttttagaataattttaaagaaaatttgggaaa<br/>atgcctattttctaaattttgtttgaaaaataacctacccattttgtatttttaaatatattttttaaataagaaaaataaaaaatataccttat</p> |
| <p><i>Lotus japonicas</i><br/>(ap006403)</p>       | <p>ccgcaaggcccaccataatctcatctgttcttcgaggatgatgtaacttctcttttgcaaagcctcctcaatacaagttcaattgggtggcggacactttacaagctt<br/>ttgcaactcattcaggtttgaagataaataatctcaaaatcaaaggctatttcttccaaggggtgtgagatatgaaatcagagatgagatccgggtccattgctcccaccc<br/>ctttgtcaatgatcttgggcttacttgggtcttcccttgactggagga<b>agga</b>tgtagacaccggggccgacgagggcggggagtgatcgccggtgcaagtgaggca<br/>cggacaaggagcggctcctggcaggcttctaggcggaaagggcacatgactgaaccgatctcacaccgaacaagaggtattccgagattgtgtagggatggactata<br/>cagttgaggagggcataatgatttgattgtactaccataacaacaagttgcaacttcttttcgggagccaaactcataagaactccatggttaagtgtgctagcc<br/>ttggatcaatattatgatgggtgacctcctgggaagtttcccgggaagcgcgcgagtgaggacaaagcgcgctgaaaagactcgtgttgttaccgtgaggttagtc<br/>gtcacgtcaggatgttata<b>attggatcagagccgacctctccagtacggtgtggttcggggacgaaccaagcggaaagtgggtgggct</b>tgtagacacctggggccga<br/>cgagggcggggagtgatcgccggtgcaagtgaggcacagacaaggagcggctcctggcaggcttctaggcggagaggcacatgactgaaccgatctcacaccgaaca<br/>agaggtattccgagattgtgtagggatggactatacagttgaggaaggcatatgatttgattgtactaccataacaacaagttgcaacttcttttcgggagccc<br/>aactcataagaactccatggttaagtgtgctagccttggatcaatattatgatgggtgacctcctgggaagtttcccgggaagcgcgcgagtgaggacaaagcgcg<br/>ctgaaaagactcgtgttgttaccgtgaggttagtcgtcacgtcaggatgttaca<b>attggatcagagccacctctccagtacggtgtggttcggggacgaaccaag</b><br/><b>cgaagttgggtggct</b>tgtagacacctggggccgacgagggcggggagtgatcgccggtgcaagtgaggcacggacaaggagcggctcctggcaggcttctaggcggag</p>                                                                                                                                                                                                                                                                                                                                                                                                                                                                                                                                                                                                                                                                                                                                                                      |

gggcacatgactgaaccgatctcacacccaacaagaggtattccgagattgtgtagggatggactatacagttgaggagggcatatatgatttgattgtactacc  
ataacaacaagttgcaacttcttttcgggagcccaactcataagaactccatggtaagtgtgctagccttggagcaatattatgatgggtgacctcctgggaagtt  
ttcctgggaagcgcgcgagtgaggacaaagcgcactgaaaagactcgtgttgttacctgaggtcagtcgctcagctcaggatgttacaaggacatctagaggctcc  
ttaaattattcattggagaataatctccaagaaactgtctacctgaaaactaatcttttgaattttgagggaaaatttgtttaaccaagcgggtgattactgctat  
gtcaacctatactatgcaggtgttctggttgcctaggtccattaacagcatgaccaaattatgagcgccttttgggcaaaagggaaattggtaggcaggttg  
gcatttgggtggggtggaatagcatcaccgaaagcaaacagcttggaggcctgggtgtgcgaaatttggcagaccacaatacagctctcctggtaaggcactt

Malus

tgtaagatcccacatcgcccggaggaaagggatgtgcttttatatgtacatactcacctccctatagaaagatgctgttttgggtggaagcccaagaacaaat  
tgtgtggcgtggtccaaagcggacaataatcttactatgtggactgggatgtgacaattaggtatcagtgccactccccgaccggaagtgtgccgacgaggacgtcga  
gcccctaaggggtggattgtaagatcccacatcgcccggggagaggaggtgatgtgccttttacgtacagatattgtaagatcccacatcgctcgggggagagga  
tgtgatatgtcttataatgtacatgtccacctccctatagagagatgcttttgggtgaaagcccaagaacaaatcgtgaagggcgtggcccaagcggacaataatct  
tactatgtggactgggatttgacaatttgggtatcaaagccaatcccttgcgggaagtgtgccgacgaggacgtcgagcccctaaggggtggattgtaagatcccac  
atcaccagggagataggaggtgatgtgtcttataatgtacatgcccacctccctatagagagacgcatttgggtgaaacctagaacaaatccataagggcgtggc  
ctaagcgggacactatcttactatgcccactgagatgtgaca

acgaggagtcggggccctaagaggggtggattgtaacatcccacatcgcccagtgatccttaaagtgtgtattcccacccctacctagcagaggcctttttagg  
agctcactggcttcgggttccatcggaactccgaagttaagtgtgctcgcgaagagcattcccagatgggtgacctgggaagttctcgtgtgagttccaga  
aacaaccgctgagggcgtggtcggggccaaagcggacaataatcgtgctacgggtggtggagcgggcccgggatgtggtggggccagggccgggatgtgacaATTT  
GGTATCAGAGCCTAACCTGGCCGTGGTGTGCCGACGAGGACGTCGAGCCCCTAAGGGGGGtgaattgtaacatcccacatcgccctaggggagtgattcttaaagt  
gtattctcatccctacctagcagaggccttttaggagctcactggcttcgggttccatcggaactccgaagttaagtgtgctcgcgagagcattcccagatgg  
gtgacctgagggaaktctcgtgtgatttccagaacaaaccgctgagggcgtggtcagggctcaaagcggacaataatcgtgctacgggtggtggagcggaccgg  
gatgtgtaggggcccgggctgggatgtgacaATTTGGTATCAGAGCCTAACCTGGCTGTGGTGTGCCGACGAGGACGTCGGGCCCTAAGGGGGTggattgtaa  
catcccacatcgcccagtgatccttaaagtgtgtattcccacccctacctcgcacgaggccttttgggagctcactggcttcgggttccatcggaactccgaa  
gttaagtgtgctcgcgaagagcattcccgtgatgggtgacctgagggaagttctcgtgtgagttcttagaaacaaaccgctgagggcgtggtcggggccaaag  
ggacaataatcgtgctacgggtggtggagcggaccgagatgtggtggggcccgggcccgggatgtgacaATTTGGTATAAGAGCCTAACCTGGCTGTGGTGTGCCGA  
CGAGGACGTCGGGCCCTAAGaggggtgtrattgtaacatcccacatcccacatgggagtgatccttaaagtgtgtattcccacccctacctagcagaggccttttgg  
gagatcactggcttcgggttccatcggaactccaaagttaagtgtgctcgcgagagcattcccagataggtgacctgagggaarttctcgtgtgagttcccag  
aaacaaaccgctgagagcgtggtarggacccaaagcggacaataatcgtgctacgggtggtggagcgggcccgggatgtggtggggccggggcgggatgtgacaATT  
TGGTATCAGAGCCTAACCTGGCCGTGGTGTGCCGACGAGGACGTCGGGCCCTAAGGGGGTggattgtaacatcccacatcgccctaggggagtgatccttaa  
gtgtattcccacccctacctagcagaggcattttgggagctcactggcttcgggttccatcggaactccgaagttaagtgtgctcgcgagagcattcccgtgat  
gggtgacctgagggaagttctcgtgtgagttcccagaacaaaccgctgagggcgtggtcggggccaaagcggacaataatcgtgctacgggtggtggagcggacc  
gggatgtggtggggcccgggatgtgacaATTTGGTATCAGAGCCTAACCTGGCTGTGGTGTGCCGACGAGGACGTCGGGCCCTAAGaggggtggattgtaacat  
cccacatcgcccagtgatccttaaagtgtgtattcccacccctacctagcagctggccttttgggagctcactggcttcgggttccatcgaaactccaaagt  
aagtgtgctcgcgagagcattcccagatgggtgacctgagggaagttctcgtgtgagttcccagaataaaaccgctgaagacgtggtcgggacccaaagcgg  
caataatcgtgctacgggtggtggagcgggcccgggctgggatgtgacaATTTGGTATCAGAGCCTAACCTGGCTGTGGTGTGCCGACGAGGACGTCGGGCCCTAAG  
GAGGGTggattgtaacatcccacatcgcccagtgatccttaaagtgtgtattcccacccctacctagcagaggccttttgggagctcactggcttcgggtt  
catcggaactccraagttaagtgtgctcgcgagagcattcccagatgggtgacctgagggaagttctcgtgtgagttcccagaacaaaccgctgagggcgtg  
gtcggggccaaagcgaacaataatcgtgctacgggtggtggagcgggcccgggatgtggtggggcctgggcccgggatgtgacaATTTGGTATCAGAGCCTAACCATG  
GCCGTGGTGTGCCGACGAGGACGTCGGGCCCTAAGGGGGTggattgtaacatcccacatcgccctaggggagtgatccttaaagtgtgtattcccacccctacctag  
cagaggccttttgggagctcactggcttcgrgttccatcggaactccgaagttaagyagtwcgcgagagcawtcccagatgggtgacctgagggaagttct  
cgtgtgagttcccagaacaaaccgctgagggcgtaatcggggccaaagcggacaataatcgtgctacgggtggtggaatgagcccgggaagtggtccgccccggggc  
aggatgtgacaATTTGGTATCAGAGCCTAACCTGGCCGCTGTGTGCCGACGAGGACGTCGGGCCCTAAGGGGGTggattctgacatcccacatcgcccagggg  
agtgtccttaaagtgtatattcccacccctacctagcagaggccttttgggagctcactggattcaggttccatcggaactccgaagttaagcagtagcgcgca  
gagcaatcccagatgggtgatccgctgggaagttctcgtgtgagttcccagaacaaaccgctgagggcgcagctcggggccaaagcggacaataatagtgctacgg  
tggtggaataggccaggaagtgctccgccccgggcccgggatgt

Malus  
(mdc000340.5  
89:1..3145  
phytozome)

*Prunus  
domesticus*

tgtagaaaagagatactttttcatatatttgcagttcacgggtacaggctttgtatacaggcctaggaggtagctaaatggtttacaacggtagcgtagtaattata  
tcaaacctaaatgctgtaattacaatacaataaagttatagttaattctatgatcattaagggatgatctgaatcctcaacatttcgatggataggggaagggttt  
ggaaagctagaagtaagactaacttgtagggatgtagttggaaagcgtgctggaacttcaaaaagggtgtttgcttgcctttgaagcatgattctgaatctgatgc  
gtagccattgccggaccacattgccaatccaccgctagacctaatttggattggttcagttaagggattaagctccaacctgtattgaaactgatccca**tgaagacc**  
**cgtgtcttggggaagcaagaacgg**tgagcaatcccacatcgctcggggagggaaaggggaagtgcctaaatgtgtgggctcacctattcctaactagggcctttt  
ggagctcattggcttcggaggggattggaactccgaagttaagcagttgtgggctggagcaatcctatgatgggtgaccccctgggaagttgctcctgagctcca  
gaaacaaaccgtgcgggcggctggtgagaatgtagccagccaaagcggacaatatagtctaggggagtcgggtcgtgaca**atttggtatcagagccgaccgaca**  
**ggaaatgtgccagcagggacgctgggcccgaaggggggtggat**tgtagaccctgtcttggggaagcaagaacgggtgagcaatcccacatcgctcggggagggaaa  
ggggaagtgtttaaatgtatgggttcgctattcctagcactaggccttttgggagctcattggcttcggaggggattggaactccgaagttaagcagttgtggc  
tggagcaatcccaggatgggtgaccccctgggaaattgctcctgagctcccagaaacaaaccgtgcgggctggtgagaatgtagccaggcccaaagcagacaatat  
agtctaggggagtg**cagcagggacgctgggcctcaaggggggtggattgtagaccctgtcttggggaagcaagaact**gtgagcaatcccacatcgctcgggga  
gggaaaggggaagtgcctaaatgtatgggctcgctattcctagcactaggccttttgggagctcattggcttcggaggggattggaactccgaagttaagcagtt  
gtgggctggagcaatcccaggatgggtgaccccctgggaaattgctcctgagctcgcagaaacaaaccgtgcgggctggtgagaatgtagccaggcccaaagc  
ggacaatatagtgtctaggggagtcgggtcgtgaca

*Fragaria*

acgaggccttttgggagctcactggcttcggaggggatgggtactccgaggttaagcatggtgatgctaaagcaatctcaggatgggtgacctactgggaaggtgct  
cctgagctgccgaaacaaaccgtgagggccggtgggcccgaagcggagaatatcgtgttacggcggaatgagtcctgggatgtgaca**aatgggtatcagagccact**  
**ctgtcgtgtggtgagtgccgacgagggcgtcggactcccaaggggggtggat**tgtaatatcccacatcggccaaacggagagaggttatgtgctgtatatgta  
catgccacctctaactaacacgaggccttttgggtggctcagcggcttcggaggggatgggtactccgaggttaagtatggtgatgctagagcaatcccaggatgg  
gtgacctactgggaagctgctcctgagctgccgaaacaaaccgtgagggccggcgggcccgaagcggacaatatcgtgttacggcgaatgggtcctgggatgtg  
**acaatgggtataagatccactctgccgtgtggtgagtgccgacgagggcgtcggactcccaagggagggggatggat**tgtaatatcccacatcggccaaacgaa  
gaggggttatgtgccttatatgtacatgccacctcca

**Supplementary Table S4.** Relative *Cassandra* copy numbers per 1C in *H.spontaneum* Evolution Canyon samples and for *H.vulgare* cultivars measured using dot blot hybridization and qPCR.

| <i>H.spontaneum</i><br>Evolution Canyon<br>lines | <i>Cassandra</i> element copy number |                            | <i>Cassandra</i> tandem <sup>2</sup> copy<br>number by qPCR |
|--------------------------------------------------|--------------------------------------|----------------------------|-------------------------------------------------------------|
|                                                  | by dot blot                          | by qPCR <sup>1</sup>       |                                                             |
| 1-SH                                             |                                      | 3061                       | 632                                                         |
| 2-SH                                             | 4333                                 | 2454                       | 543                                                         |
| 3-SH                                             |                                      | 1278                       | 272                                                         |
| 4-SH                                             |                                      | 1601                       | 400                                                         |
| 5-SH                                             | 4237                                 | 3023                       | 581                                                         |
| 6-SH                                             |                                      | 2644                       | 404                                                         |
| 7-SH                                             |                                      | 1316                       | 244                                                         |
| 8-SH                                             |                                      | 2075                       | 351                                                         |
| 9-SH                                             |                                      | 2094                       | 351                                                         |
| <b>Avg. ±SD</b>                                  | <b>4285 ±66.525 (±1.55%)</b>         | <b>2172 ±418 (±19.26%)</b> | <b>420 ±84 (±20.03%)</b>                                    |
| 11-SM                                            |                                      | 2170                       | 369                                                         |
| 12-SM                                            |                                      | 2340                       | 400                                                         |
| 13-SM                                            |                                      | 2720                       | 464                                                         |
| 14-SM                                            | 5437                                 | 2985                       | 548                                                         |
| 15-SM                                            |                                      | 3536                       | 680                                                         |
| 16-SM                                            |                                      | 2606                       | 474                                                         |
| 17-SM                                            |                                      | 3004                       | 528                                                         |
| 18-SM                                            |                                      | 3422                       | 687                                                         |
| 19-SM                                            |                                      | 2511                       | 438                                                         |
| 20-SM                                            |                                      | 2625                       | 474                                                         |
| <b>Avg. ±SD</b>                                  | <b>5437</b>                          | <b>2792 ±261 (±9.34%)</b>  | <b>506 ±63 (±12.47%)</b>                                    |
| 21-SL                                            |                                      | 1980                       | 313                                                         |
| 22-SL                                            | 5032                                 | 3365                       | 680                                                         |
| 23-SL                                            |                                      | 2758                       | 483                                                         |
| 24-SL                                            |                                      | 3536                       | 751                                                         |
| 25-SL                                            |                                      | 3023                       | 548                                                         |
| 26-SL                                            |                                      | 3555                       | 626                                                         |
| 27-SL                                            | 5859                                 | 1449                       | 237                                                         |
| 28-SL                                            |                                      | 3004                       | 518                                                         |
| 29-SL                                            |                                      | 2853                       | 412                                                         |
| 30-SL                                            |                                      | 2720                       | 460                                                         |
| <b>Avg. ±SD</b>                                  | <b>5446 ±573 (±10.52%)</b>           | <b>2824 ±393 (±13.92%)</b> | <b>503 ±94 (±18.60%)</b>                                    |
| 31-NL                                            |                                      | 2891                       | 493                                                         |
| 32-NL                                            |                                      | 2910                       | 488                                                         |
| 33-NL                                            |                                      | 3118                       | 533                                                         |
| 34-NL                                            | 3896                                 | 3896                       | 575                                                         |
| 35-NL                                            |                                      | 3403                       | 400                                                         |
| 36-NL                                            |                                      | 2340                       | 272                                                         |
| 37-NL                                            |                                      | 3592                       | 433                                                         |

|                                                                        |                            |                            |                           |
|------------------------------------------------------------------------|----------------------------|----------------------------|---------------------------|
| 39-NL                                                                  |                            | 2872                       | 328                       |
| 40-NL                                                                  |                            | 2720                       | 285                       |
| <b>Avg. ±SD</b>                                                        | <b>3896</b>                | <b>3082 ±294 (±9.53%)</b>  | <b>423 ±67 (±15.94%)</b>  |
| 42-NM                                                                  | 4389                       | 3232                       | 469                       |
| 43-NM                                                                  |                            | 4674                       | 1150                      |
| 44-NM                                                                  |                            | 3839                       | 493                       |
| 45-NM                                                                  |                            | 2815                       | 304                       |
| 46-NM                                                                  |                            | 2208                       | 252                       |
| 47-NM                                                                  | 5123                       | 3517                       | 416                       |
| 48-NM                                                                  |                            | 3384                       | 442                       |
| 49-NM                                                                  |                            | 3668                       | 513                       |
| <b>Avg. ±SD</b>                                                        | <b>4756 ±509 (±10.69%)</b> | <b>3417 ±471 (±13.77%)</b> | <b>505 ±179 (±35.46%)</b> |
| 51-NH                                                                  |                            | 1980                       | 222                       |
| 52-NH                                                                  |                            | 3479                       | 451                       |
| 53-NH                                                                  | 5081                       | 5736                       | 848                       |
| 54-NH                                                                  |                            | 2853                       | 292                       |
| 55-NH                                                                  |                            | 2056                       | 226                       |
| 57-NH                                                                  |                            | 3365                       | 508                       |
| 58-NH                                                                  |                            | 2587                       | 261                       |
| 59-NH                                                                  | 6040                       | 1752                       | 200                       |
| 60-NH                                                                  |                            | 3877                       | 381                       |
| 61-NH                                                                  |                            | 3137                       | 408                       |
| <b>Avg. ±SD</b>                                                        | <b>5561 ±665 (±11.95%)</b> | <b>3082 ±686 (±22.26%)</b> | <b>380 ±115 (±30.29%)</b> |
| <i>H.vulgare</i> , winter<br>barley, 424 (Tu<br>Da Mai 1, China)       | 6732                       |                            |                           |
| <i>H.vulgare</i> , winter<br>barley, 431 (Han<br>85-222, China)        | 7364                       |                            |                           |
| <i>H.vulgare</i> , winter<br>barley, 833<br>(Casbon, USA)              | 5930                       |                            |                           |
| <i>H.vulgare</i> , winter<br>barley, 938<br>(Tennessee<br>Winter, USA) | 6761                       |                            |                           |
| <i>H.vulgare</i> ,<br>Kymppi, (callus)                                 | 5550                       |                            |                           |

<sup>1</sup> PCR fragment with primers: 784 and 977

<sup>2</sup> PCR fragment with primers: 981 and 982
